# Supplementary material for: Effect of Myrtenol and Its Synergistic Interactions with Antimicrobial Drugs in the Inhibition of Single and Mixed Biofilms of Candida auris and Klebsiella pneumoniae
Source: MDPI journal article supplement (doi:10.3390/microorganisms10091773), 2022-09-02
Supplement: s1 [file s1]

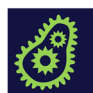

## Supplementary materials

**Table S1.** MIC of myrtenol (MYR), Caspofungin (CAS) and Meropenem (MEM) against *C. auris* and *K. pneumoniae*.

| Strains                         | MYR              | CAS                                    | MEM           |
|---------------------------------|------------------|----------------------------------------|---------------|
|                                 |                  | MIC ( $\mu\text{g mL}^{-1}$ ) $\pm$ SD |               |
| <i>C. auris</i> DSM 24092       | 50.0 $\pm$ 5.0   | 1.0 $\pm$ 0.5                          | -             |
| <i>K. pneumoniae</i> ATCC 13883 | 200.0 $\pm$ 20.0 | -                                      | 1.0 $\pm$ 0.2 |
